# Supplementary material
Source: Springer Nature journal article supplement (https://www.springermedizin.de/resource/supplementary/12936_2010_1214_MOESM5_ESM.pdf/9549228)

**Percentage**

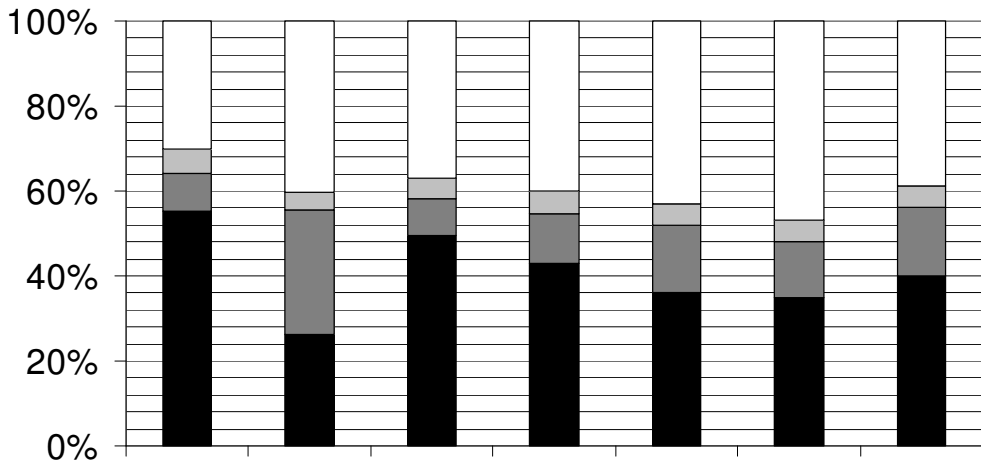

child <5

child  
5-15

pregnant

female  
16-48

male  
16-48

over 48

All

**Age Group**

Supplement: MOESM5 [file 9549228]
